# Supplementary material for: (γ-Methoxy propyl amine)2PbBr4: a novel two-dimensional halide hybrid perovskite with efficient bluish white-light emission
Source: Royal Society of Chemistry journal article supplement (doi:10.1039/d0qi01446j), 2021-01-01
Supplement: d0qi01446j1.pdf [file d0qi01446j1.pdf]

## **( $\gamma$ -Methoxy propyl amine)<sub>2</sub>PbBr<sub>4</sub>: A Novel Two-dimensional Halide**

### **Hybrid Perovskite with Efficient Bluish White-light Emission**

Yezhan Li,<sup>a,b,c</sup> Chengmin Ji,<sup>\*b,c</sup> Lina Li,<sup>b,c</sup> Sasa Wang,<sup>b,c</sup> Shiguo Han,<sup>b,c</sup> Yu Peng,<sup>b,c</sup> Shuhua Zhang,<sup>\*a</sup> and Junhua Luo<sup>\*b,c</sup>

<sup>a</sup>*College of Chemistry and Bioengineering (Guangxi Key Laboratory of Electrochemical and Magnetochemical Functional Materials), Guilin University of Technology, Guilin, Guangxi, 541004, P. R. China.*

<sup>b</sup>*State Key Laboratory of Structural Chemistry, Fujian Institute of Research on the Structure of Matter, Chinese Academy of Sciences, Fuzhou, Fujian 350002, P. R. China.*

<sup>c</sup>*Fujian Science & Technology Innovation Laboratory for Optoelectronic Information of China, Fuzhou, Fujian 350108, P. R. China.*

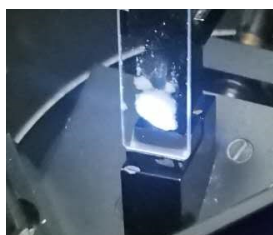

**Figure S1.** The photo-image of the  $\gamma$ -MPAPB microscale crystals under UV (365 nm) irradiation.

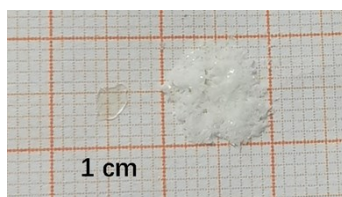

**Figure S2.** The bulk single crystal and microscale crystals of  $\gamma$ -MPAPB.

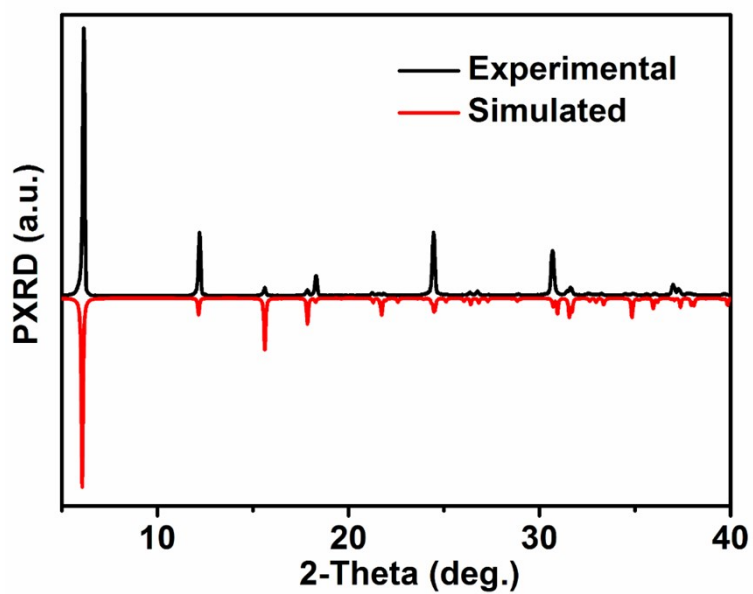

**Figure S3.** Simulated (black) and experimental (red) PXRD patterns of  $\gamma$ -MPAPB.

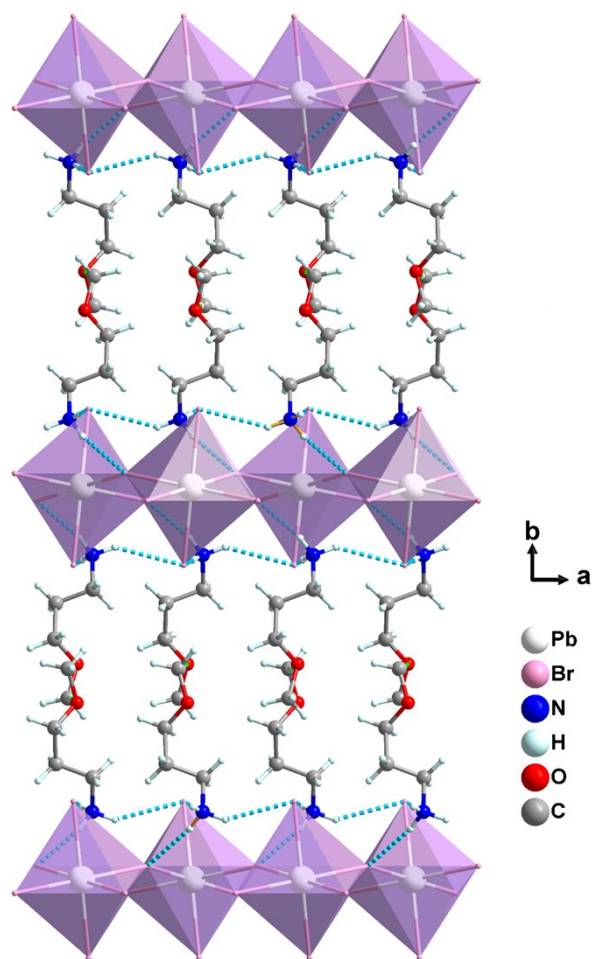

Figure S4. The packing framework of  $\gamma$ -MPAPB at ab plane.

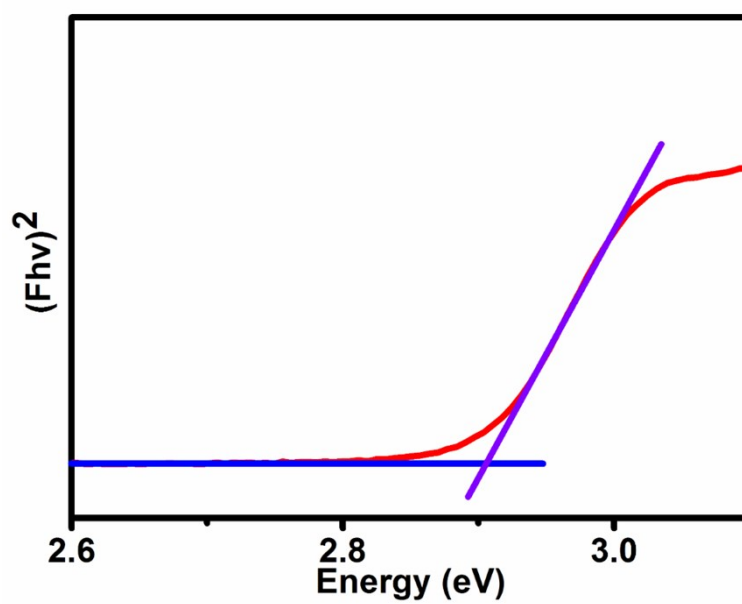

Figure S5. Band gap obtained from optical absorption spectrum of  $\gamma$ -MPAPB.

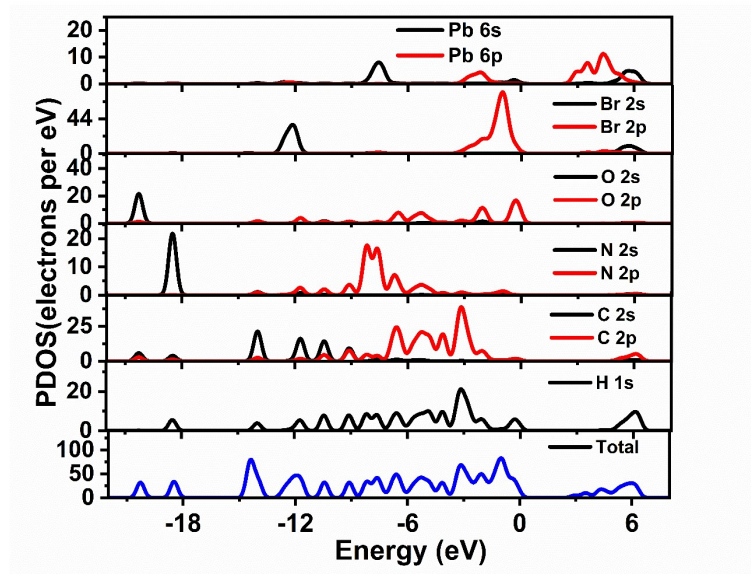

Figure S6. PDOS spectra of  $\gamma$ -MPAPB.

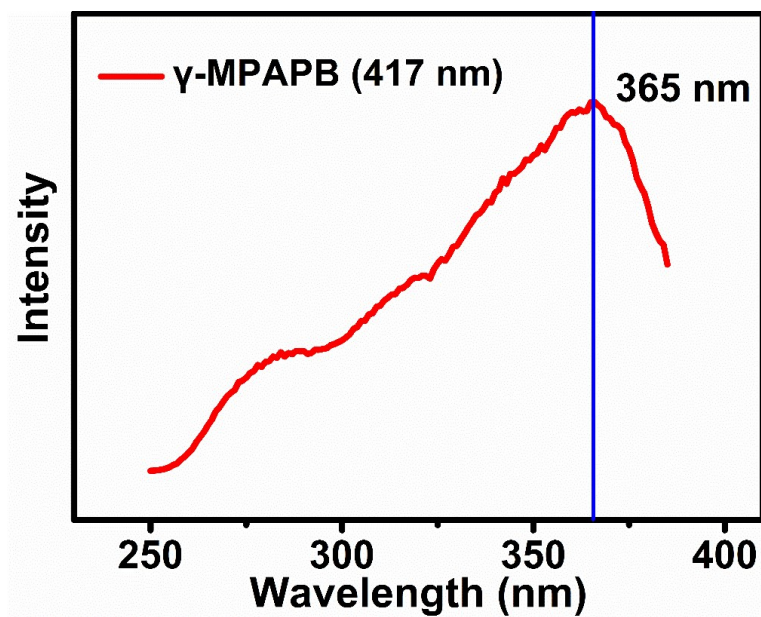

Figure S7. Excitation spectrum of  $\gamma$ -MPAPB.

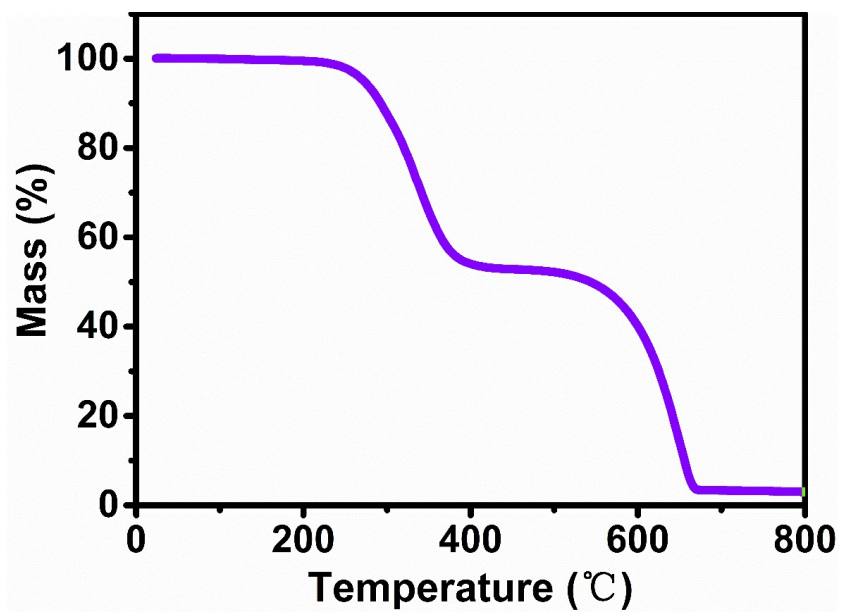

Figure S8. TG curve of compound  $\gamma$ -MPAPB.

**Table S1.** Crystal data for  $\gamma$ -MPAPB collected at 272 K.

|                                |                                                                                 |
|--------------------------------|---------------------------------------------------------------------------------|
| Temperature/K                  | 272                                                                             |
| Empirical formula              | C <sub>8</sub> H <sub>24</sub> Br <sub>4</sub> N <sub>2</sub> O <sub>2</sub> Pb |
| Crystal system                 | orthorhombic, <i>Pbca</i>                                                       |
| Cell parameters                | a = 8.1685(10) Å<br>b = 29.085(5) Å<br>c = 8.169 Å                              |
| V (Å <sup>3</sup> )            | 1940.7(4)                                                                       |
| Z, ρcal. (g/cm <sup>3</sup> )  | 4, 2.420                                                                        |
| F(000)                         | 1296.0                                                                          |
| Theta range (°)                | 5.602 to 49.986                                                                 |
| Limiting indices               | -9 ≤ h ≤ 9,<br>-34 ≤ k ≤ 34,<br>-9 ≤ l ≤ 9                                      |
| Reflections collected / unique | 9366, 1703<br>[Rint = 0.1790, Rsigma = 0.1000]                                  |
| Data/restraints/parameter      | 1703/8/81                                                                       |
| Completeness                   | 100                                                                             |
| GOF                            | 1.053                                                                           |
| Final R indices [I > 2σ(I)]    | R1 = 0.0656,<br>wR2 = 0.1537                                                    |
| R indices (all data)           | R1 = 0.0917,<br>wR2 = 0.1754                                                    |
| Largest diff. peak and hole    | 1.36, -2.94 e.Å <sup>-3</sup>                                                   |

**Table S2.** Hydrogen lengths and angles of  $\gamma$ -MPAPB at 272 K.

| Bond             | D...A (Å) | D - H...A (°) |
|------------------|-----------|---------------|
| N(1)—H(1A)⋯Br(2) | 3.430     | 167.1         |
| N(1)—H(1B)⋯Br(1) | 3.345     | 159.8         |
| N(1)—H(1C)⋯Br(1) | 3.426     | 146.7         |
| C(4)—H(4B)⋯O(1)  | 3.60      | 175.1         |

<sup>1</sup>1/2+X,+Y,1/2-Z; <sup>2</sup>2-X,-Y,-Z; <sup>3</sup>1+X,+Y,+Z; <sup>4</sup>+X,1/2-Y,-1/2+Z

**Table S3.** Bond Lengths of  $\gamma$ -MPAPB.

| Atom Atom            | Length/Å   | Atom Atom | Length/Å  |
|----------------------|------------|-----------|-----------|
| Pb1 Br2 <sup>1</sup> | 2.9861(13) | N1 C1     | 1.535(16) |
| Pb1 Br2              | 2.9913(13) | O1 C3     | 1.377(15) |
| Pb1 Br2 <sup>2</sup> | 2.9861(13) | O1 C4     | 1.400(14) |
| Pb1 Br2 <sup>3</sup> | 2.9914(13) | C3 C2     | 1.589(17) |
| Pb1 Br1              | 2.9672(17) | C1 C2     | 1.477(18) |
| Pb1 Br1 <sup>3</sup> | 2.9672(17) |           |           |

<sup>1</sup>-1/2+X,+Y,-1/2-Z; <sup>2</sup>3/2-X,-Y,1/2+Z; <sup>3</sup>1-X,-Y,-Z

**Table S4.** Bond Angles of  $\gamma$ -MPAPB.

| Atom Atom Atom                        | Angle/°    | Atom Atom Atom           | Angle/°   |
|---------------------------------------|------------|--------------------------|-----------|
| Br2 <sup>1</sup> Pb1 Br2 <sup>2</sup> | 180.00(7)  | Br1 Pb1 Br2 <sup>2</sup> | 93.14(5)  |
| Br2 Pb1 Br2 <sup>3</sup>              | 180.0      | Br1 Pb1 Br2 <sup>1</sup> | 86.86(5)  |
| Br2 <sup>2</sup> Pb1 Br2 <sup>3</sup> | 88.337(15) | Br1 Pb1 Br2 <sup>3</sup> | 88.83(5)  |
| Br2 <sup>1</sup> Pb1 Br2              | 88.337(15) | Br1 <sup>3</sup> Pb1 Br2 | 93.14(5)  |
| Br2 <sup>1</sup> Pb1 Br2 <sup>3</sup> | 91.663(15) | Br1 Pb1 Br1 <sup>3</sup> | 180.0     |
| Br2 <sup>2</sup> Pb1 Br2              | 91.663(15) | Pb1 <sup>4</sup> Br2 Pb1 | 150.17(6) |
| Br1 Pb1 Br2                           | 91.17(5)   | C3 O1 C4                 | 108.1(14) |
| Br1 <sup>3</sup> Pb1 Br2 <sup>3</sup> | 91.17(5)   | O1 C3 C2                 | 108.2(16) |
| Br1 <sup>3</sup> Pb1 Br2 <sup>2</sup> | 86.86(5)   | C2 C1 N1                 | 101.2(13) |
| Br1 <sup>3</sup> Pb1 Br2              | 88.83(5)   | C1 C2 C3                 | 104.0(15) |

<sup>1</sup>-1/2+X,+Y,-1/2-Z; <sup>2</sup>3/2-X,-Y,1/2+Z; <sup>3</sup>1-X,-Y,-Z; <sup>4</sup>3/2-X,-Y,-1/2+Z
